# Supplementary material
Source: PubMed Central journal article supplement (PMC9378680)
Supplement: NIHMS1820018-supplement-mmc1.pdf [file NIHMS1820018-supplement-mmc1.pdf]

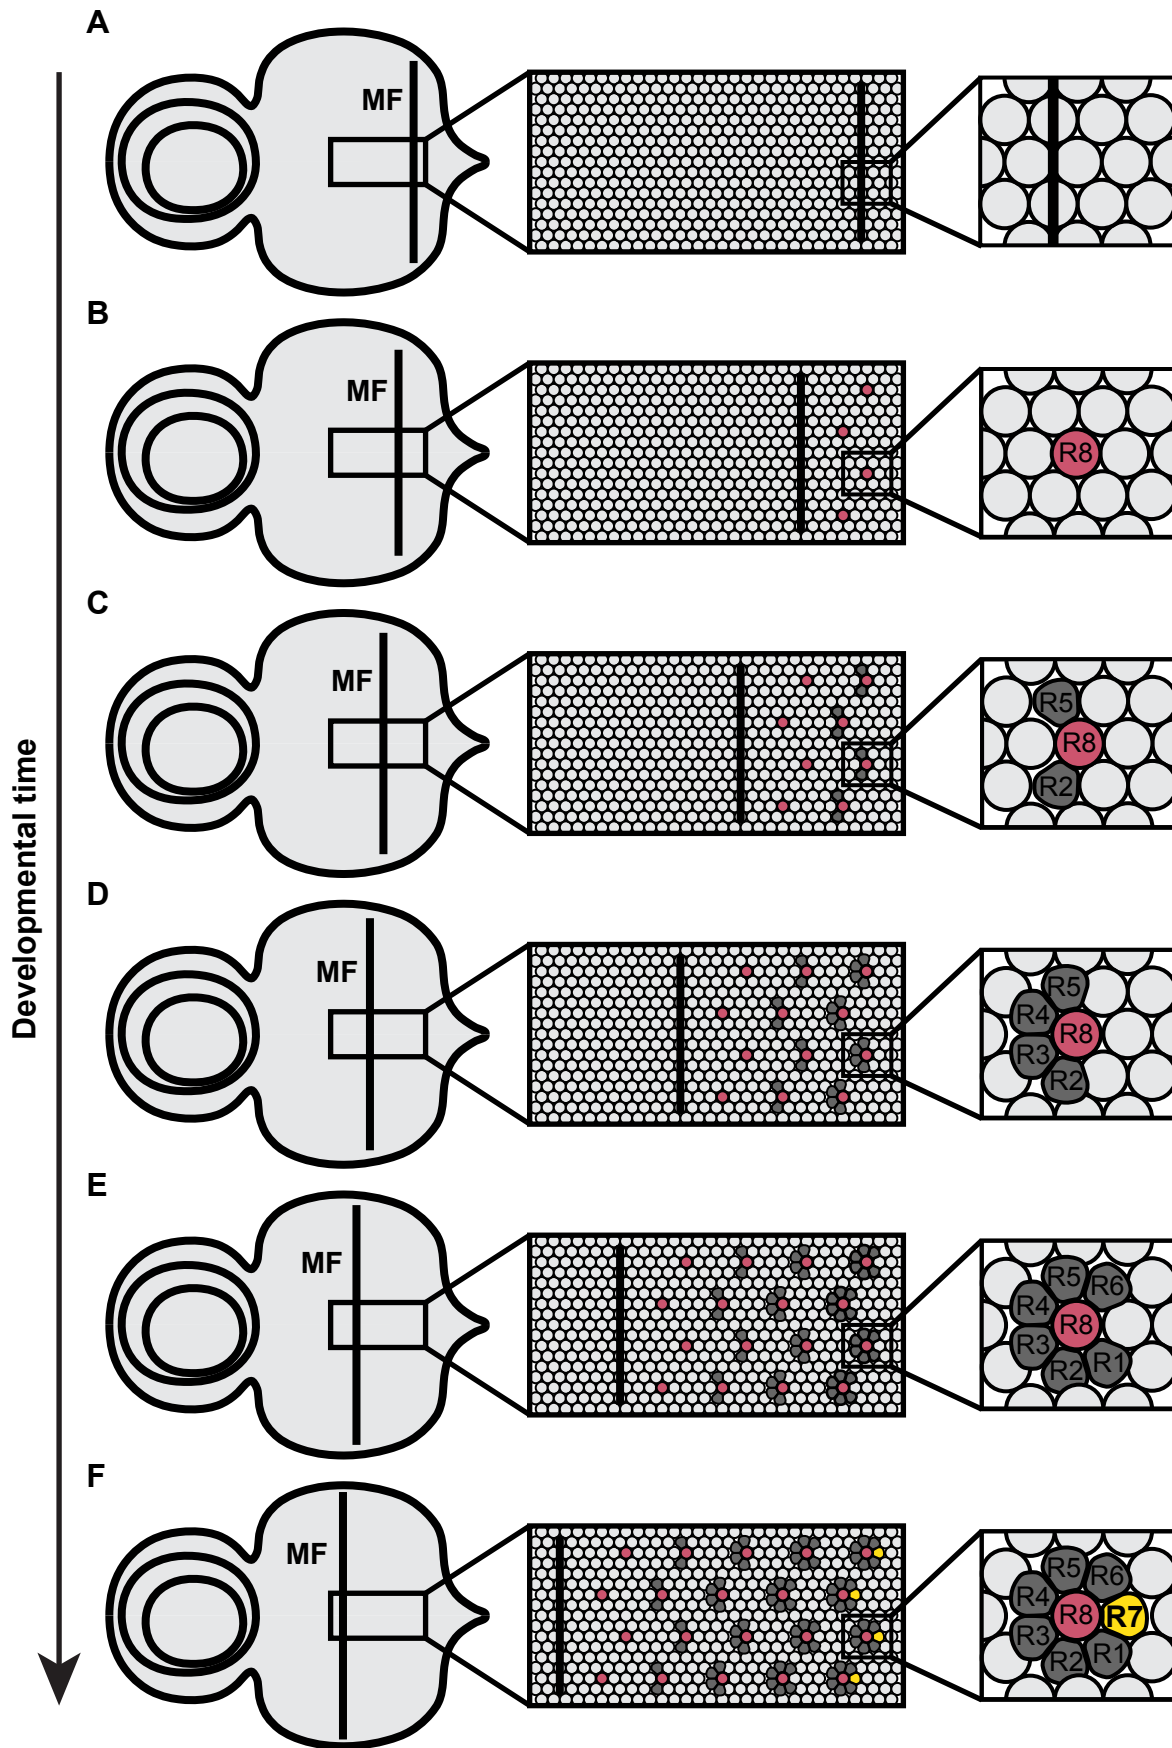

FIGURE S1

**Figure S1. Schematic of photoreceptor specification in the eye/antennal disc.  
Related to Figure 1.**

**A-F)** Photoreceptor specification and morphogenetic furrow during eye development. Light gray circle=unspecified cell; maroon circle=R8 cell; dark gray circle=outer photoreceptor cell (R1-R6); yellow circle=R7 cell.

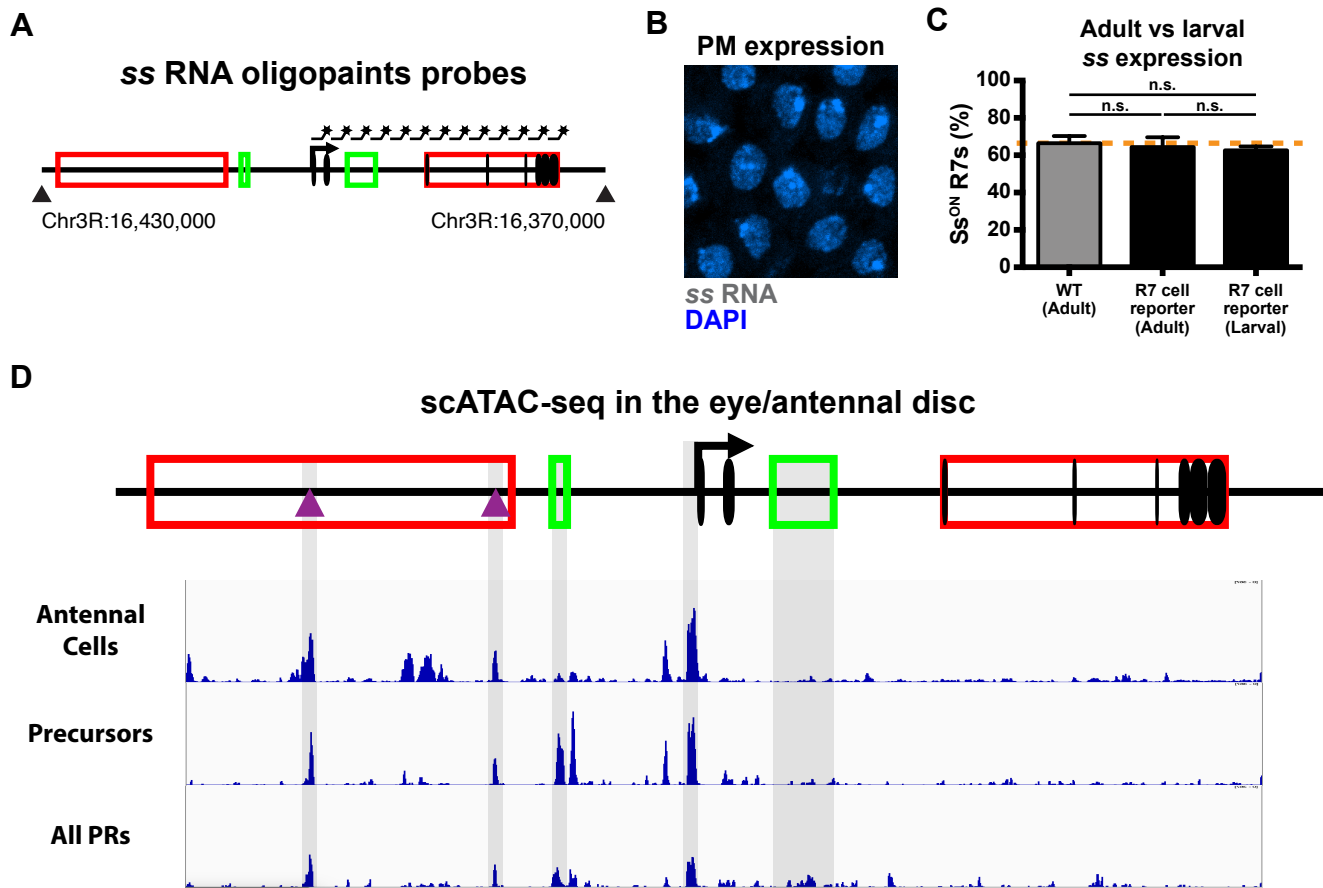

**FIGURE S2**

**Figure S2. *ss* expression analysis; scATAC-seq analysis at the *ss* locus. Related to Figure 2.**

**A)** Schematic of probes used to label *ss* RNA.

**B)** *ss* is not expressed in peripodial membrane cells (*ss*<sup>OFF</sup> control). Gray=*ss* RNA; blue=DAPI.

**C)** Percent *Ss*<sup>ON</sup> R7s is similar in adult R7s in WT flies, in adult R7s in the R7 cell reporter line, and in larval R7s in the R7 cell reporter line. Orange line indicates mean percent *Ss*<sup>ON</sup> R7s in adults. n.s. denotes  $p > 0.05$ .

**D)** scATAC-seq reads at the *ss* locus by region of the eye/antennal disc. scATAC-seq data were integrated with independently generated scRNA-seq data to produce a virtual map enabling cell identification based on gene expression and enhancer identification based on chromatin accessibility. Gray rectangles=peaks matching *cis* regulatory elements; purple triangles=putative PREs; PRs=photoreceptors.

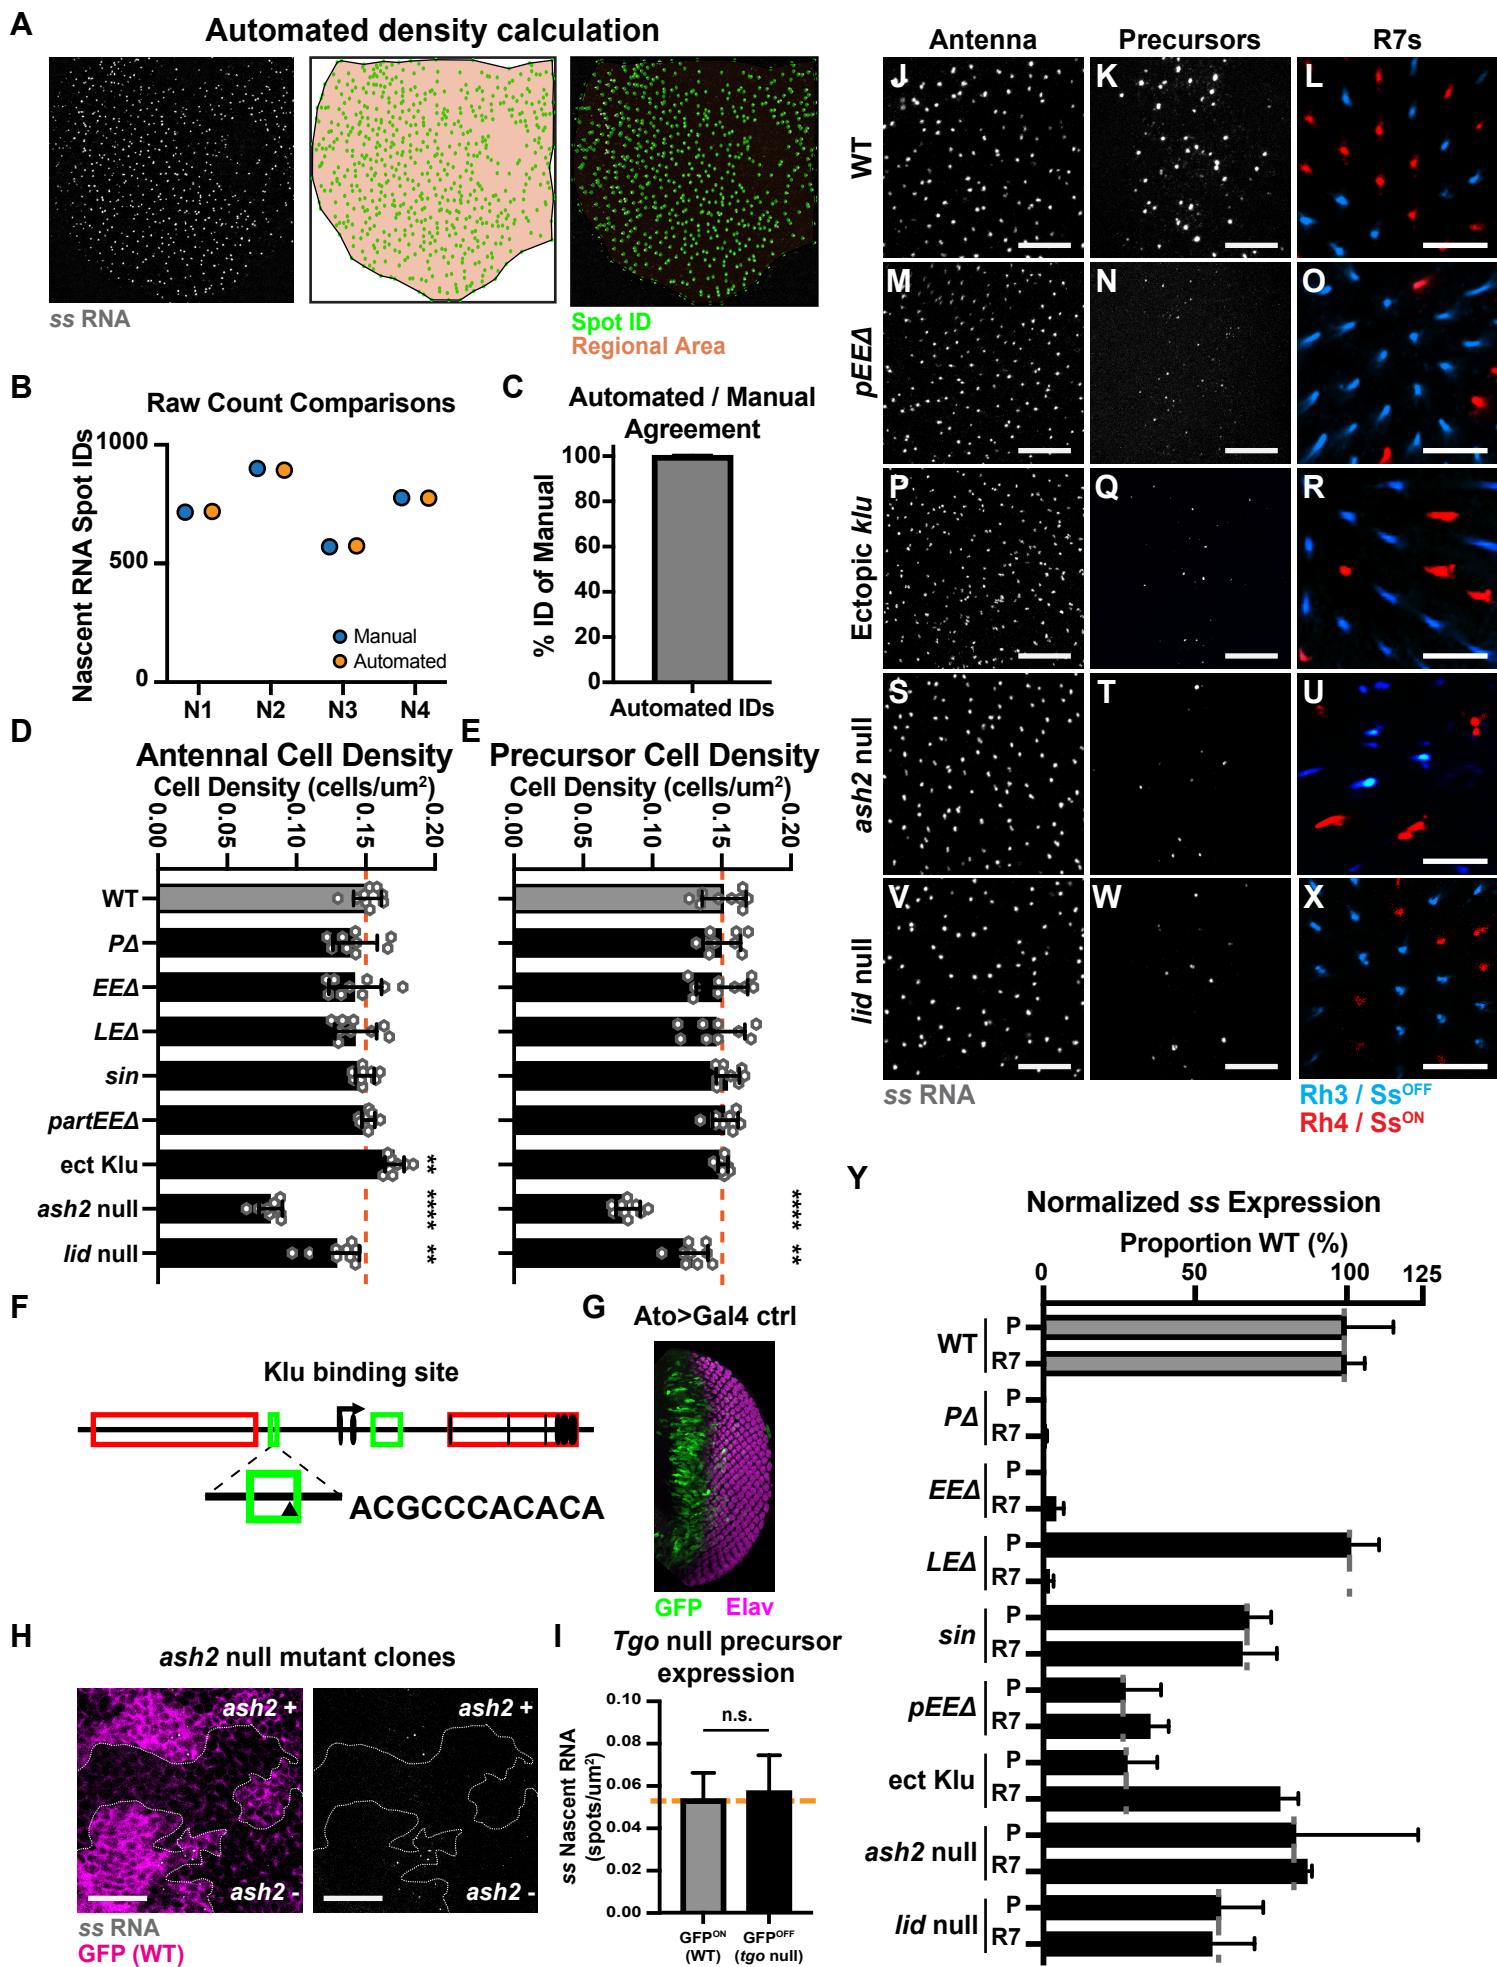

**FIGURE S3**

**Figure S3. Automated density calculation; decreasing early ss expression decreases the proportion of Ss<sup>ON</sup> R7s. Related to Figure 3.**

**For A-C)** Automated identification and calculation of ss nascent RNA expression and density.

**A)** Example of identification of nascent ss RNA spots and determination of boundary region. Gray=ss RNA; green=spot ID; orange=boundary and area.

**B)** Comparison between the automated and manual quantification of 4 images to confirm high fidelity automated quantification.

**C)** Percent agreement between automated and by hand quantification. N=4.

**D-E)** Quantification of cell density within the antenna (**D**) and precursor (**E**) regions to ensure changes in expression are not derived from tissue differences. N=3, n=9.

Orange dashed line=WT cell density. \*\* denotes  $p < 0.005$ ; \*\*\*\* denotes  $p < 0.0001$ .

**F)** Schematic of the Klu binding site and binding motif in the *early enhancer* of the ss locus.

**G)** Ato>Gal4 drives GFP in precursors. Green=GFP; magenta=Elav.

**H)** Early ss RNA expression is reduced in precursors in *ash2* null mutant clones. GFP- indicates *ash2* mutant clones; GFP+ indicates wild type clones. Magenta=GFP; dashed line=clone boundary. Gray=ss RNA; green=spot ID; orange=regional area.

**I)** Quantification of expression for Tgo null mutant clones in **3Y**. Orange line indicates mean WT ss expression. n.s. denotes  $p > 0.05$ .

**For J, K, M, N, P, Q, S, T, V, W)** Scalebar=10  $\mu$ m.

**For J, M, P, S, V)** ss RNA expression in the antenna. Gray=ss RNA.

**For K, N, Q, T, W)** Early ss RNA expression in precursors. Gray=ss RNA.

**For L, O, R, U, X)** Adult Rh3/Ss<sup>OFF</sup> and Rh4/Ss<sup>ON</sup> expression in R7s. Blue=Rh3; red=Rh4.

**J-L)** In wild type (WT) animals, ss is expressed in antennal cells, precursors, and a subset of R7s.

**M-O)** *pEE $\Delta$ /def* mutants display normal ss expression in antennal cells, reduced ss expression in precursors, and a decrease in % Rh4/Ss<sup>ON</sup> R7s.

**P-R)** Animals with ectopic expression of Klu display normal ss expression in antennal cells, reduced ss expression in precursors, and a decrease in % Rh4/Ss<sup>ON</sup> R7s.

**S-U)** *ash2* null mutants display normal ss expression in antennal cells, reduced ss expression in precursors, and a decrease in % Rh4/Ss<sup>ON</sup> R7s.

**V-X)** *lid* null mutants display normal ss expression in antennal cells, reduced ss expression in precursors, and a decrease in % Rh4/Ss<sup>ON</sup> R7s.

**Y)** Quantification of the proportional changes from WT in precursors and R7s normalized to cell density. P=precursors; R7=R7s; gray solid line=WT precursor and R7 agreement; gray dashed lines=precursor and R7 agreement by genotype.

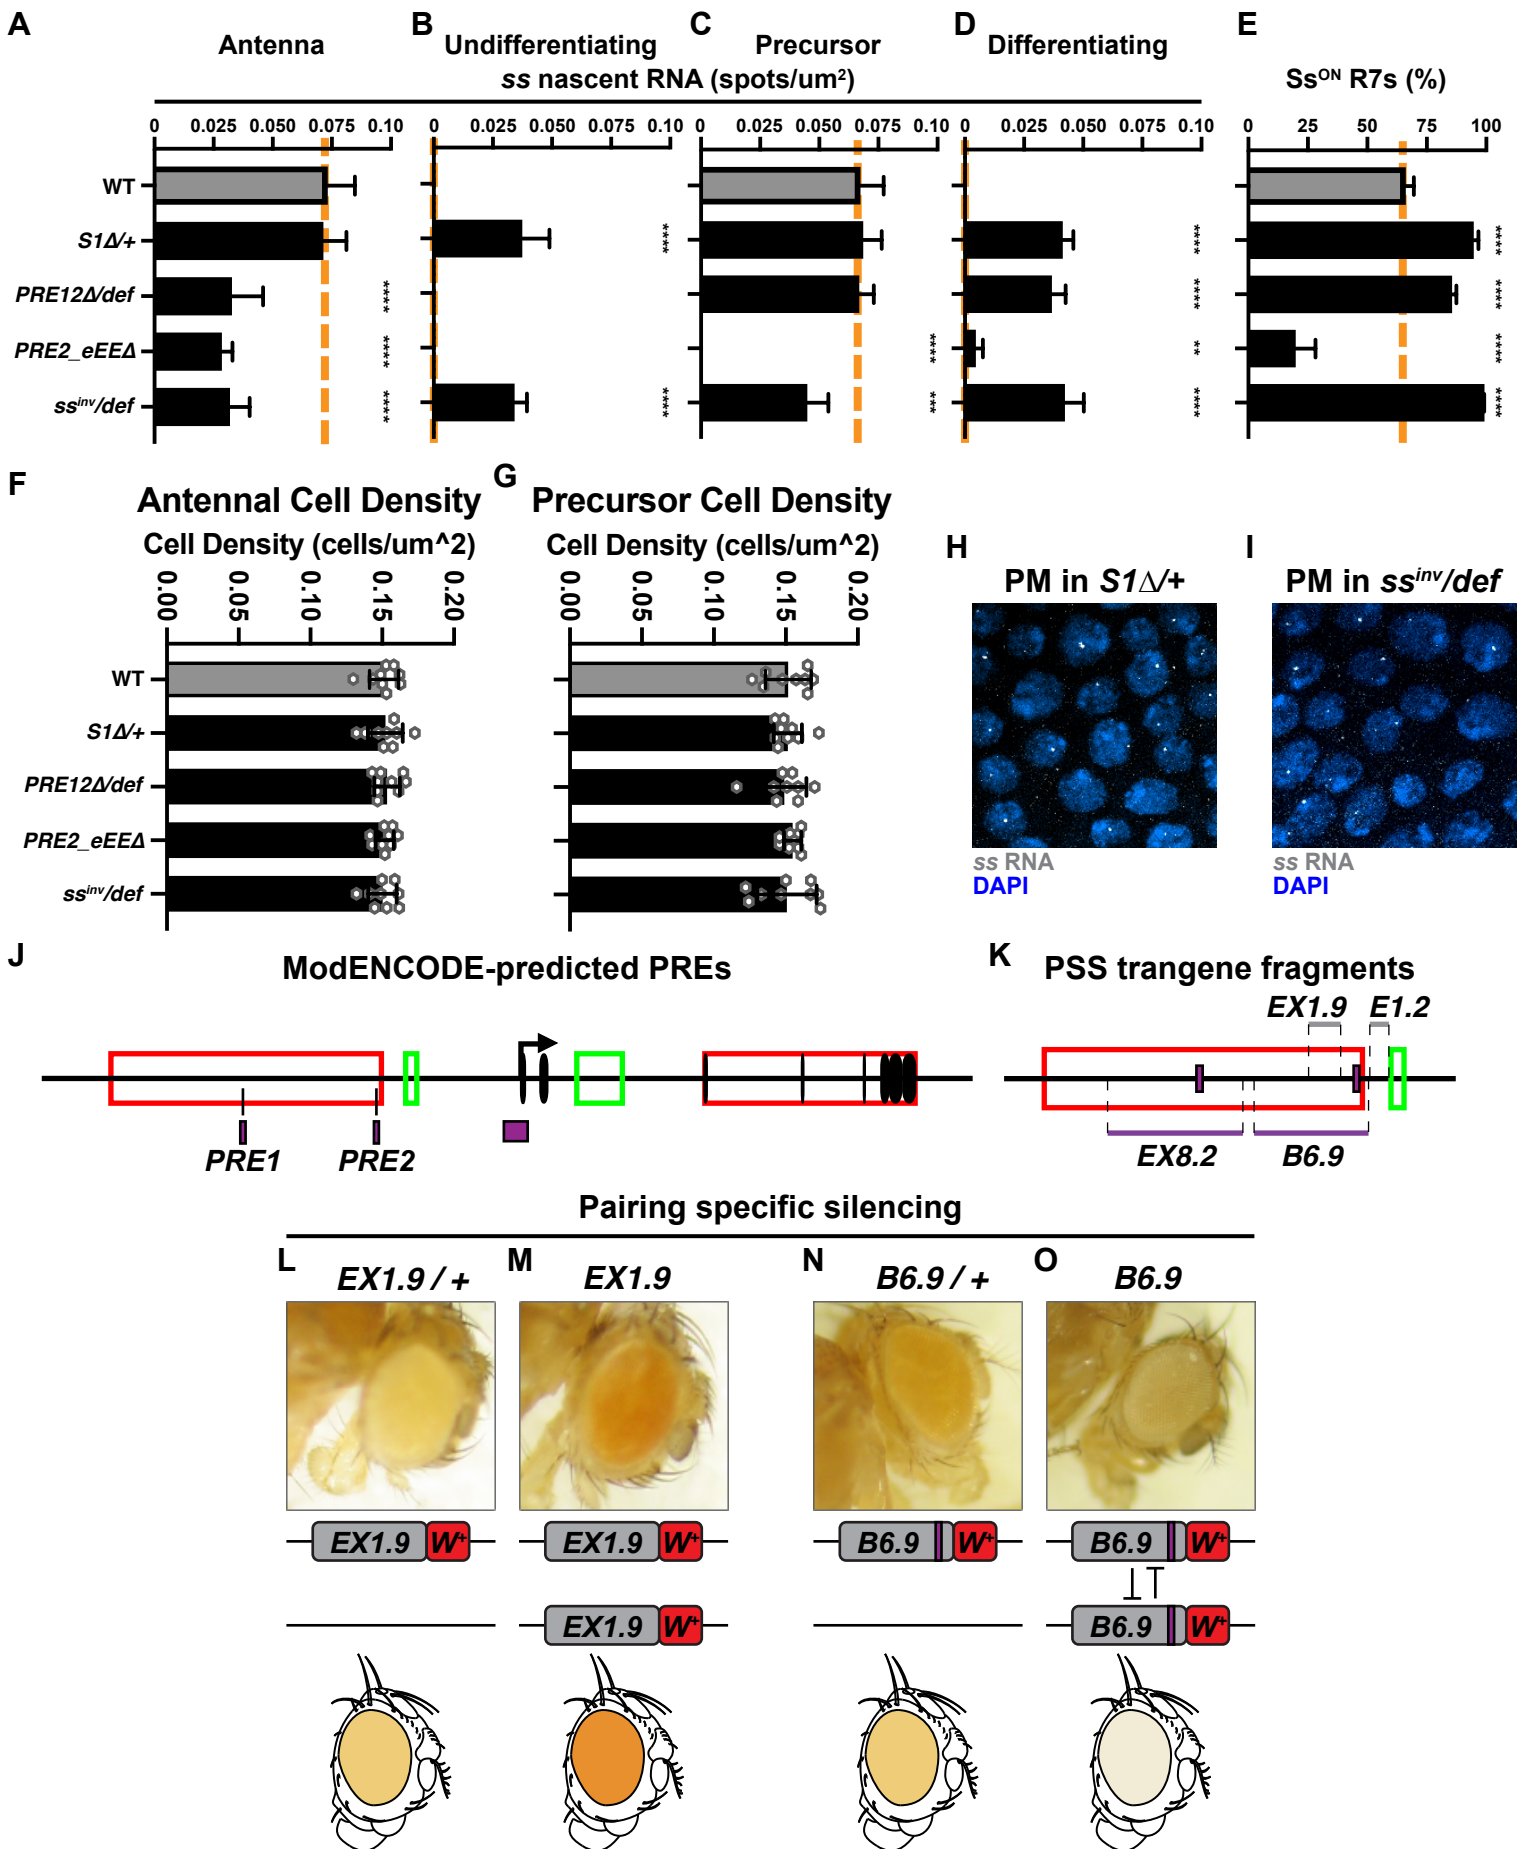

**FIGURE S4**

**Figure S4. Derepressing early *ss* expression increases the proportion of *Ss*<sup>ON</sup> R7s; analyzing PREs in the *ss* locus. Related to Figure 4.**

**For A-E)** Quantification of *ss* expression. Orange line indicates mean WT *ss* expression. \*\* denotes  $p < 0.005$ ; \*\*\* denotes  $p < 0.0005$ ; \*\*\*\* denotes  $p < 0.0001$ .

**A)** Antennal cells.

**B)** Undifferentiated cells.

**C)** Precursors

**D)** Differentiating cells.

**E)** R7s

**F-G)** Quantification of cell density within the antenna cell (**F**) and precursor cell (**G**) regions to ensure changes in expression are not derived from tissue differences. N=3, n=9.

**H-I)** *ss* is expressed in peripodial membrane cells in *S1Δ* and *ss*<sup>inv</sup> mutants. Gray=*ss* RNA; blue=DAPI.

**J)** Predicted PREs in the *ss* locus. Data adapted from FlyBase Jbrowse modENCODE plug-in. Purple rectangles indicate putative PREs.

**For K-O)** We tested the activity of PRE1 and PRE2 using pairing sensitive silencing assays (Kassis, 1994; Kassis et al., 1991). In this assay, flies that are homozygous for a transgene carrying the *white* gene, but not a PRE, have darker red eyes than heterozygotes. In contrast, flies that are homozygous for a transgene carrying the *white* gene linked to a PRE have lighter eye color than heterozygotes. For flies carrying the EX8.2 transgene that contained PRE1 or the B6.9 transgene that contained PRE2, homozygotes had lighter eye color than heterozygotes (**Fig. S4K, N-O**), consistent with pairing sensitive silencing and the presence of functional PREs. In contrast, for flies carrying the EX1.9 transgene or the E1.2 transgene that neighbored PRE2, homozygotes had darker eye color than heterozygotes (**Fig. S4K-M**), consistent with the absence of functional PREs (Emmons et al., 2007). Together, the ChIP peaks for Polycomb group Proteins, the scATAC-seq peaks, and the pairing sensitive silencing assays suggest that PRE1 and PRE2 are functional PREs.

**K)** Schematic for regions of DNA used to generate transgenes. Purple line=DNA fragment containing a PRE; gray line=DNA fragment lacking a PRE.

**For L-O)** Gray oval=DNA fragment denoted in K; purple line=PRE site; red oval=*white* gene. Schematic for genetic background and cartoon for eye color below.

**L)** Flies heterozygous for the EX1.9 transgene display light orange eyes.

**M)** Flies homozygous for the EX1.9 transgene display dark orange eyes.

**N)** Flies heterozygous for the E6.9 transgene display orange eyes.

**O)** Flies homozygous for the E6.9 transgene display very light orange eyes.



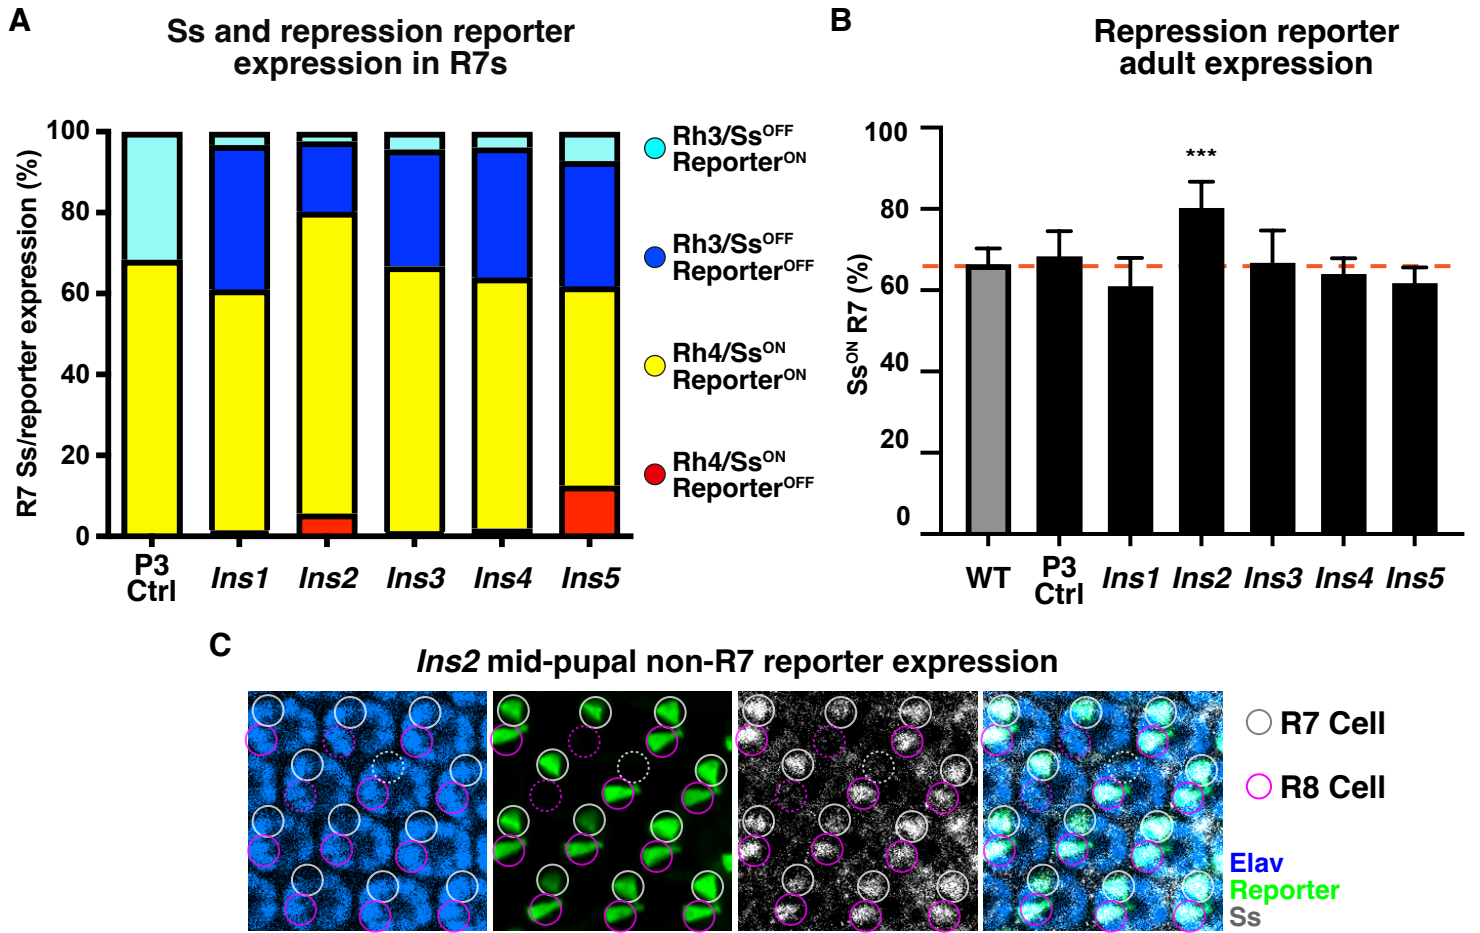

**FIGURE S5**

**Figure S5. Repression by the *ss* locus limits expression to a subset of R7s; reporter and Ss are expressed in R8s in flies carrying *Ins2*. Related to Figure 5.**

**A)** Quantification of rhodopsin and reporter expression. Cyan=Rh3/Ss<sup>OFF</sup>, reporter<sup>ON</sup>; blue=Rh3/Ss<sup>OFF</sup>, reporter<sup>OFF</sup>; yellow=Rh4/Ss<sup>ON</sup>, reporter<sup>ON</sup>; red=Rh4/Ss<sup>ON</sup>, reporter<sup>OFF</sup>.

**B)** % Rh4/Ss<sup>ON</sup> R7s in control flies or flies carrying the repression reporter. Orange line indicates mean WT Ss expression.

**C)** The reporter and Ss are expressed in R8s in flies carrying *Ins2* in mid-pupal retinas. Gray circles=R7s; maroon circles=R8s; blue=Elav; green=reporter; gray=Ss. Solid lines indicate reporter expressing cell; dotted lines indicate no reporter expression.

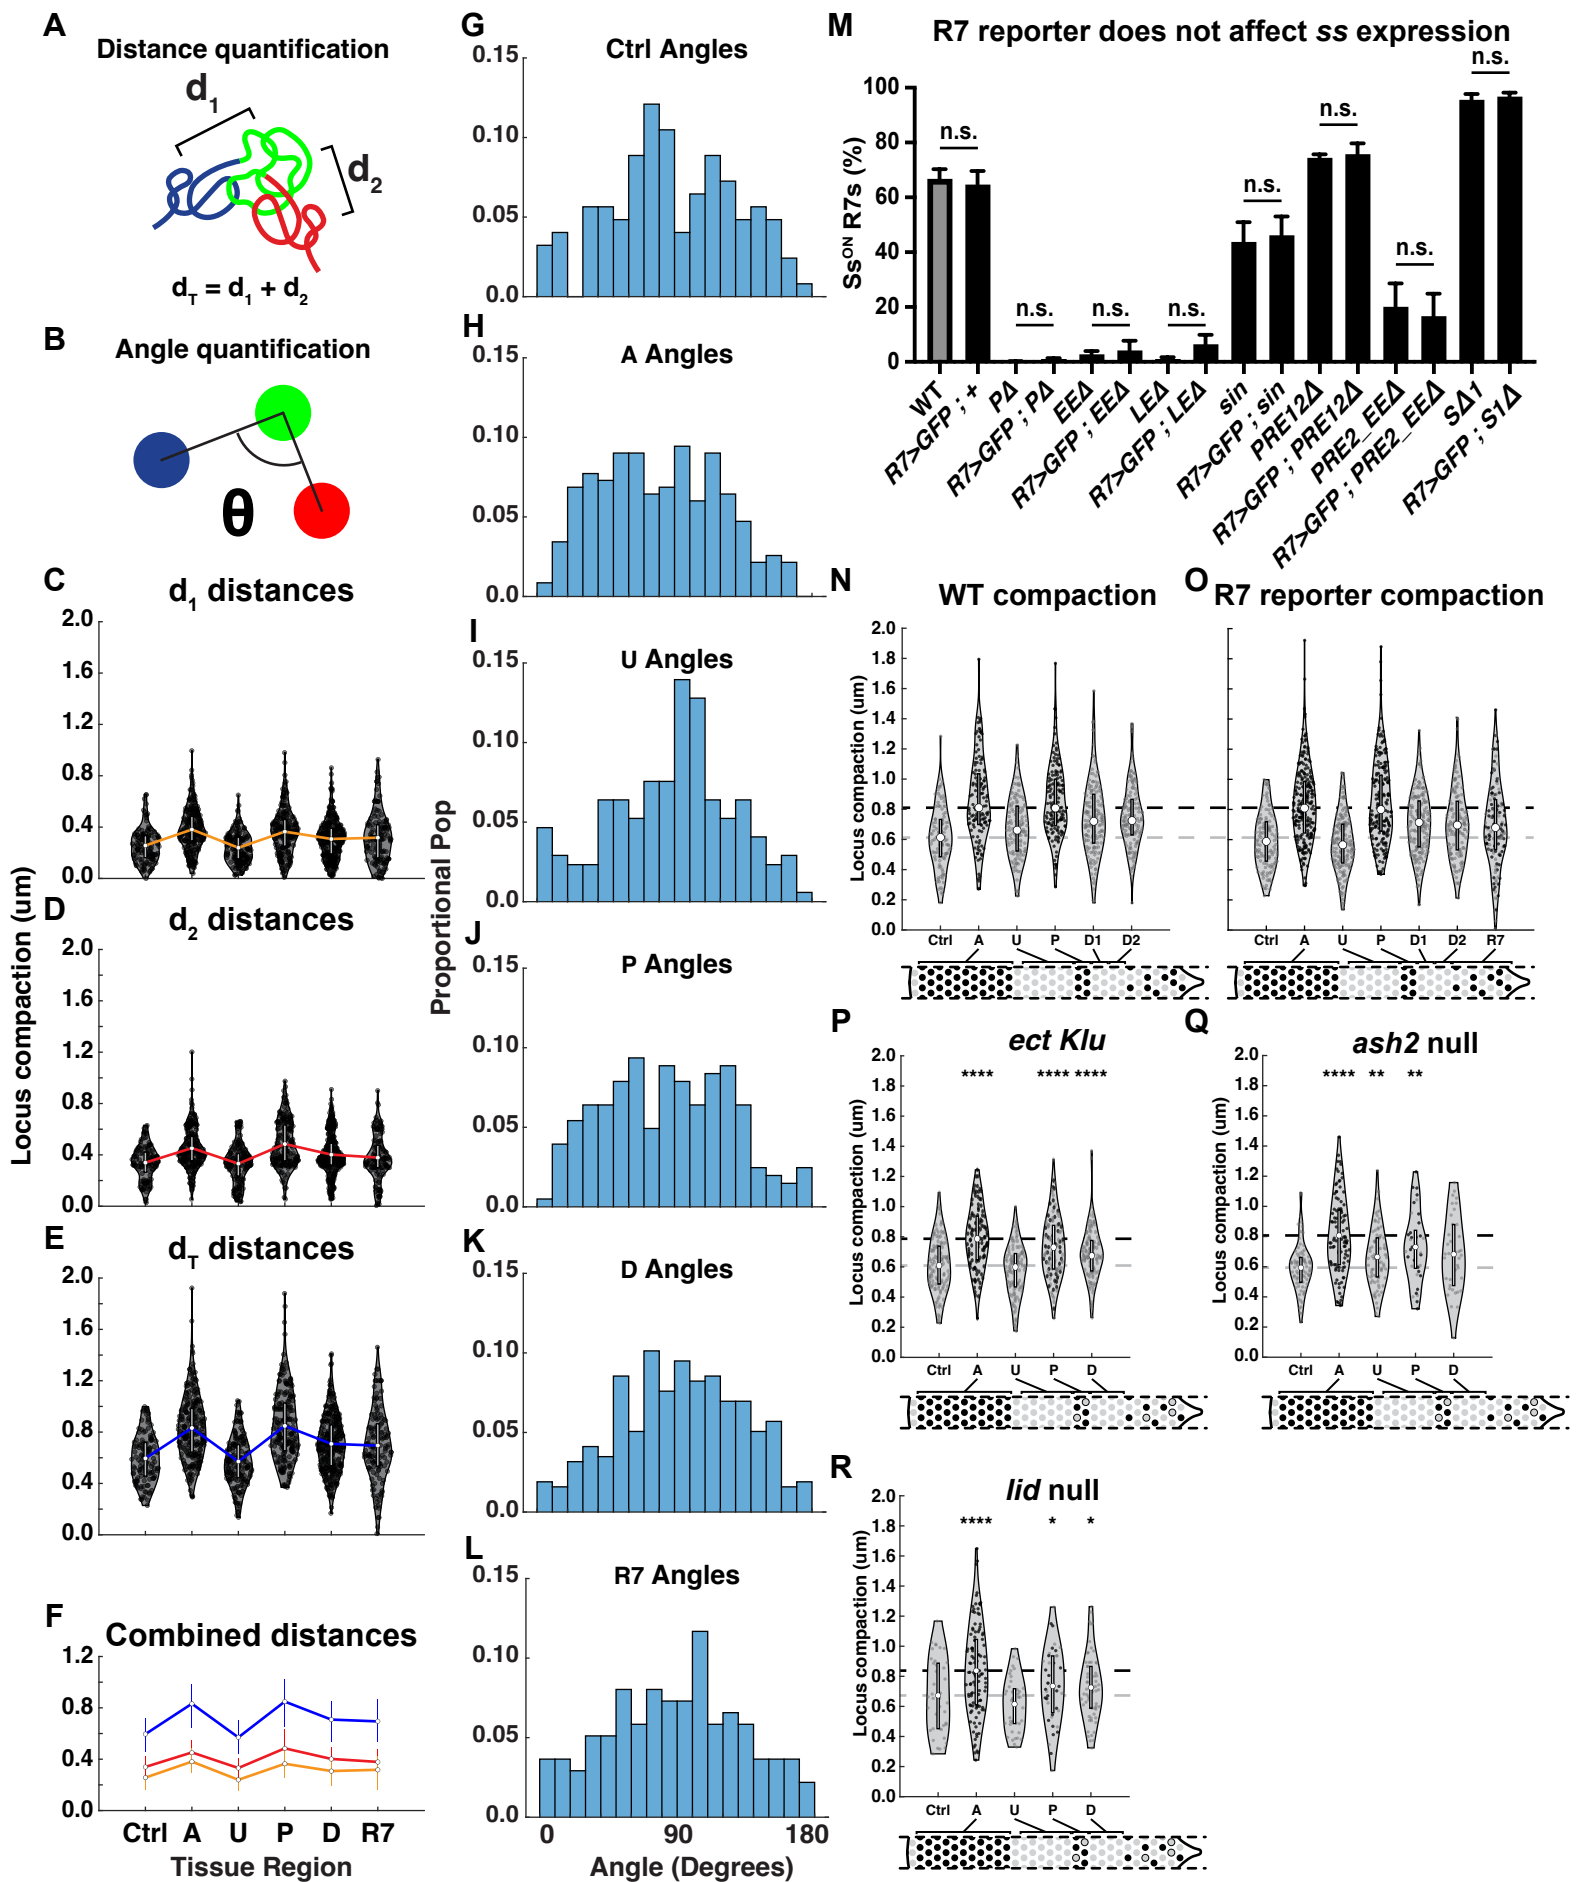

**FIGURE S6**

**Figure S6. Analysis of compaction comparing  $d_1$ ,  $d_2$ , and  $d_t$  and angles; R7 reporter does not affect ss expression; compaction in additional mutants. Related to Figure 6.**

**For A-B)** Blue=ss upstream DNA; green=ss locus DNA; red=ss downstream DNA.

A) Schematic for compaction distance calculations.

B) Schematic for compaction angle calculations.

**For C-L)** Ctrl=peripodial membrane cells; A=antennal cells; U=undifferentiated cells; P=precursors; D=differentiating cells; R7=R7s.

**C)**  $d_1$  compaction distances. Orange line=compaction changes by region.

**D)**  $d_2$  compaction distances. Red line=compaction changes by region.

**E)**  $d_t$  compaction distances. Blue line=compaction changes by region.

**F)** Compaction changes as in **C-E**.

**For G-L)** Quantification of compaction angles by tissue region.

**G)** Ctrl cell angles.

**H)** Antennal cell angles.

**I)** Undifferentiated cell angles.

**J)** Precursor cell angles.

**K)** Differentiating cell angles.

**L)** R7 cell angles.

**M)** Adult Rh3/Ss<sup>OFF</sup> and Rh4/Ss<sup>ON</sup> expression in R7s with and without the R7 reporter show no effect on ss expression. n.s=p> 0.05.

**For N-R)** Quantification of compaction. Ctrl=peripodial membrane cells; A=antennal cells; U=undifferentiated cells; P=precursors; D=differentiating cells; R7=R7s. Black circle=ss<sup>ON</sup> cell; gray circle=ss<sup>OFF</sup> cell; white rectangle=quartile; white circle=median; gray dashed line=ss<sup>OFF</sup> control/peripodial membrane median; black dashed line=ss<sup>ON</sup> control/antennal cells median. \* denotes p < 0.05; \*\* denotes p < 0.005; \*\*\*\* denotes p < 0.0001.

**N-O)** WT (**N**) and R7 reporter (**O**) lines show no differences in compaction dynamics.

Differentiating cells have been subdivided into early differentiating/D1 and late differentiating/D2. D1 and D2 cells display no difference in compaction.

**P)** *ectopic klu* mutants. n > 106 cells for each region.

**Q)** *ash2* null mutants. n > 38 cells for each region.

**R)** *lid* null mutants. n > 40 cells for each region.

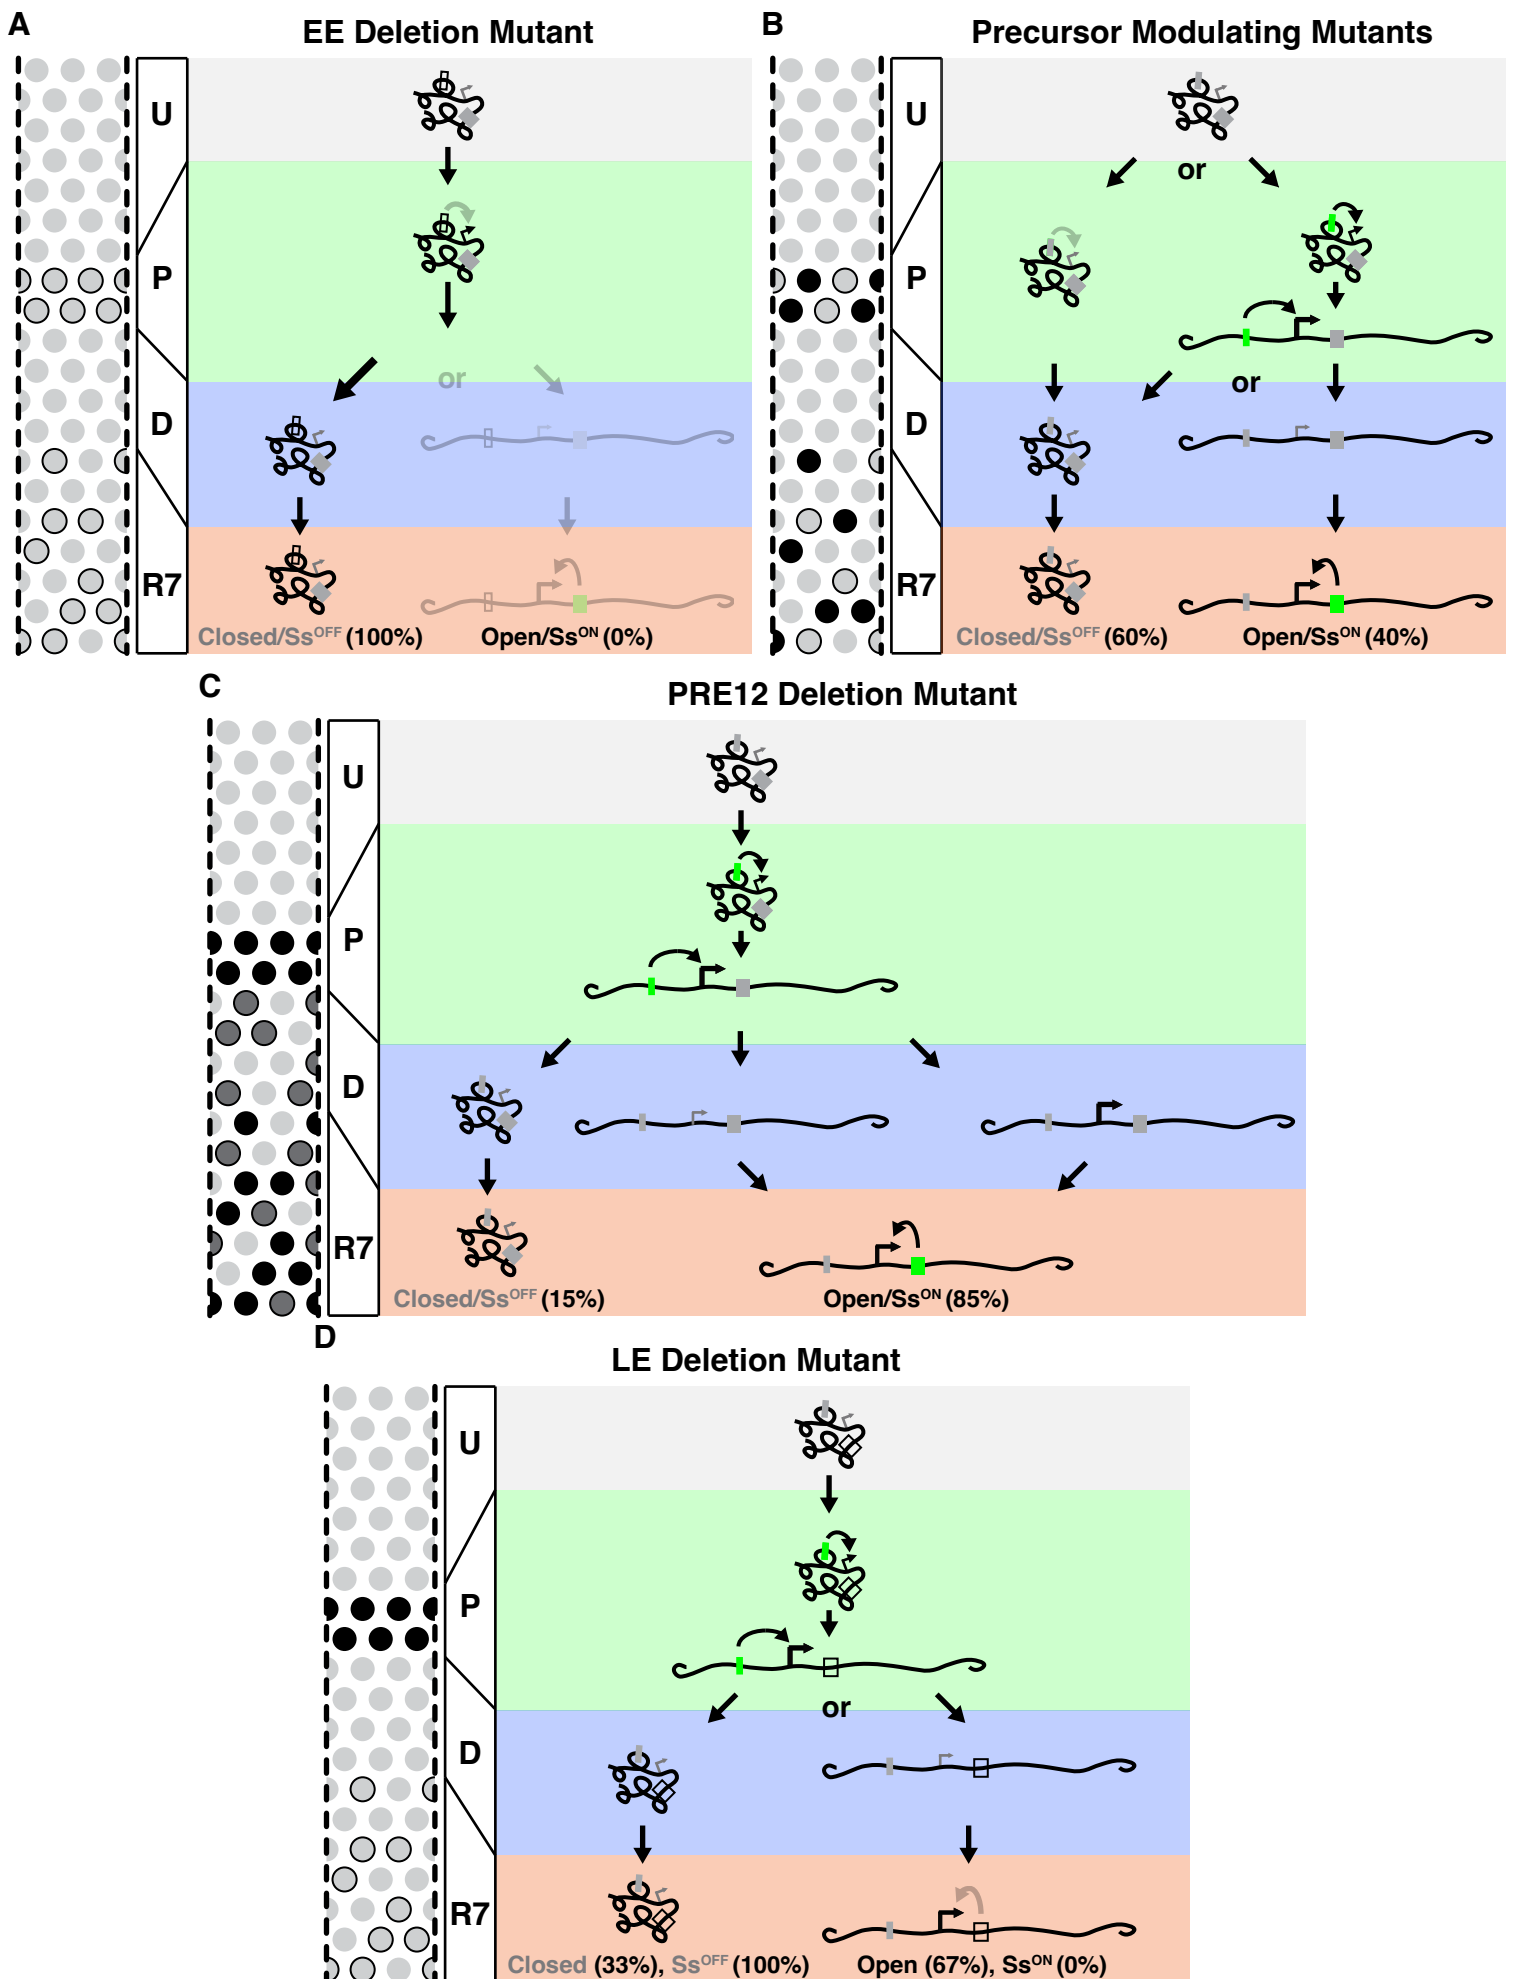

**FIGURE S7**

**Figure S7. Relating the proposed mechanism for stochastic R7 subtype specification to *ss* mutant phenotypes. Related to Figure 7.**

We briefly review four key experiments and how they fit with this model. In *EEΔ* mutants, *ss* is not expressed in precursors and the *ss* locus remains compact as cells mature into  $Ss^{OFF}$  R7s (**Fig. S7A**). In mutants with reduced *ss* expression in precursors, *ss* is expressed in a subset of precursors and the *ss* locus opens. In some of these cells, *ss* remains open as cells differentiate into  $Ss^{ON}$  R7s whereas in others, *ss* compacts as cells mature into  $Ss^{OFF}$  R7s. For the subset of precursors that do not express *ss* in precursors, the *ss* locus remains compact as these cells mature into  $Ss^{OFF}$  R7s (**Fig. S7B**). In *PRE12Δ* mutants, *ss* is expressed in all precursors and the *ss* locus opens. In some differentiating cells, *ss* expression ceases and the *ss* locus remains open as cells mature into  $Ss^{ON}$  R7s or closes as cells mature into  $Ss^{OFF}$  R7s. In the other differentiating cells, *ss* expression continues and the *ss* locus remains open as cells mature into  $Ss^{ON}$  R7s (**Fig. S7C**). In *LEΔ* mutants, *ss* is not expressed in R7s and *ss* locus compaction is unaffected (**Fig. S7D**).

**For A-D)** U=undifferentiated cells; P=precursors; D=differentiating cells; R7=R7s. Gray box=inactive enhancer; green box=active enhancer.

**A)** *EEΔ* mutants.

**B)** Precursor modulating mutants.

**C)** *PRE12Δ* mutants.

**D)** *LEΔ* mutants.

**Table S1. CRISPR deletion screen, Related to Figure 2**

| Deletion Name  | Deletion Size (bp) | Rh4/Ss <sup>ON</sup> (%) |
|----------------|--------------------|--------------------------|
| R1 $\Delta$    | 6,229              | 67.68 $\pm$ 2.4          |
| R2 $\Delta$    | 6,863              | 65.84 $\pm$ 4.7          |
| EE $\Delta$    | 1,278              | 0                        |
| pEE $\Delta$   | 4,089              | 24.9 $\pm$ 5.8           |
| extEE $\Delta$ | 5,367              | 0                        |
| R3 $\Delta$    | 1,540              | 53.63 $\pm$ 4.3          |
| P $\Delta$     | 1,993              | 0                        |
| R4 $\Delta$    | 1,543              | 63.38 $\pm$ 3.68         |
| LE $\Delta$    | 3,181              | 0                        |
| R5 $\Delta$    | 1,645              | 51.25 $\pm$ 5.78         |
| R6 $\Delta$    | 3,848              | 65.56 $\pm$ 4.56         |
| R7 $\Delta$    | 2,393              | 55.78 $\pm$ 7.8          |
| R8 $\Delta$    | 3,933              | 50.147 $\pm$ 2.1         |
| R9 $\Delta$    | 4,871              | 61.01 $\pm$ 2.2          |

**Table S2. Trans factor regulator screen, Related to Figure 3**

| Category             | Gene              | Mutant allele                                                  | Rh4/Ss <sup>ON</sup> (%) |
|----------------------|-------------------|----------------------------------------------------------------|--------------------------|
| Wildtype             | yw                | yw <sup>67</sup>                                               | 61 ± 6                   |
| RNAi Control         | GFP               | RNAi                                                           | 52 ± 2                   |
| Insulator            | CP190             | RNAi                                                           | 67 ± 5 ↑                 |
|                      | Su(HW)            | RNAi                                                           | 55 ± 4                   |
|                      | Mdg4              | RNAi                                                           | 51 ± 7                   |
| TRX complex          | Trx               | Trx <sup>E2</sup>                                              | 79 ± 9 ↑                 |
|                      |                   | RNAi                                                           | 55 ± 6                   |
|                      | Ash2              | RNAi v20                                                       | 37 ± 9 ↓                 |
|                      |                   | RNAi v22                                                       | 17 ± 8 ↓                 |
|                      | Mnn1              | Mnn1 <sup>e173</sup>                                           | 33 ± 5 ↓                 |
|                      |                   | Mnn1 <sup>e30</sup>                                            | 40 ± 5 ↓                 |
|                      |                   | RNAi                                                           | 61 ± 12                  |
| CRISPR Deletion      |                   | 59 ± 12                                                        |                          |
| TRR complex          | Trl               | RNAi                                                           | 57 ± 6                   |
| PRC1                 | Pc                | RNAi                                                           | 55 ± 7                   |
|                      |                   | Pc <sup>4</sup>                                                | 94 ± 3                   |
|                      |                   | Pc <sup>XT</sup>                                               | No R7s                   |
|                      | Ph-d Ph-p         | Ph-d <sup>410</sup> Ph-p <sup>401</sup>                        | 43 ± 8 ↓                 |
| Polycomb Recruitment | Cg                | Cg <sup>A22</sup>                                              | 55 ± 9                   |
|                      | Pho               | Pho <sup>1</sup>                                               | 32 ± 6 ↓                 |
|                      |                   | Pho <sup>b</sup>                                               | 61 ± 5                   |
|                      |                   | RNAi                                                           | 72 ± 4 ↑                 |
|                      | Phol              | Phol <sup>81A</sup>                                            | 63 ± 11                  |
| Spps                 | Spps <sup>1</sup> | No retinas                                                     |                          |
| PRC2                 | E(z)              | E(z) <sup>61</sup> 18°C control                                | 68 ± 4                   |
|                      |                   | E(z) <sup>61</sup> 29°C hs 3 <sup>rd</sup> instar 4hrs         | 57 ± 3                   |
|                      |                   | E(z) <sup>61</sup> 29°C hs 3 <sup>rd</sup> instar 24hrs        | 65 ± 7                   |
|                      |                   | E(z) <sup>61</sup> 29°C hs 2nd instar to late pupation 120 hrs | 55 ± 3 ↓                 |
|                      | Su(z)12           | Su(z)12 <sup>5</sup>                                           | 44 ± 8 ↓                 |
|                      | Psc               | Psc <sup>h28</sup>                                             | 65 ± 9                   |
| Histone              | H3.3              | H3.3K27M                                                       | 69 ± 4                   |
| Eye development      | Lid               | RNAi                                                           | No R7s                   |
|                      |                   | Lid <sup>140</sup>                                             | 36.5 ± 7 ↓               |
|                      | Osa               | Osa <sup>306</sup>                                             | 57 ± 3                   |



**Table S3. Fly lines, Related to STAR Methods**

| Short Genotype          | Full Genotype                                                                       | Figures                         | Source                                                     |
|-------------------------|-------------------------------------------------------------------------------------|---------------------------------|------------------------------------------------------------|
| WT                      | <i>yw ; + ; +</i>                                                                   | 1, 2, 3, S1, S2, S3, S4, S5, T2 | N/A                                                        |
| ss Def                  | <i>yw ; + ; Df(3R)Exel6269</i>                                                      | 2, 3, S3                        | Bloomington (7736), (Parks et al., 2004)                   |
| ss Protein Null         | <i>yw ; + ; ss<sup>d115.7</sup> / Df(3R)Exel6269</i>                                | 1                               | (Duncan et al., 1998)                                      |
| R7 Reporter             | <i>yw ; pm181&gt;Gal4,UAS&gt;mCD8 GFP/CyO ; +</i>                                   | 1, 5, S5                        | (Lee et al., 2001)                                         |
| EE Reporter             | <i>yw ; ; EE&gt;GFP ; +</i>                                                         | 1                               | N/A                                                        |
| LE Reporter             | <i>yw ; LE&gt;GFP ; +</i>                                                           | 1                               | N/A                                                        |
| <i>PΔ</i>               | <i>yw ; + ; ss<sup>PΔ</sup></i>                                                     | 1, 2, 5, S5                     | N/A                                                        |
| <i>eEEΔ</i>             | <i>yw ; + ; ss<sup>eEEΔ</sup> / Df(3R)Exel6269</i>                                  | 1                               | N/A                                                        |
| <i>pEEΔ</i>             | <i>yw ; + ; ss<sup>pEEΔ</sup> / Df(3R)Exel6269</i>                                  | 1, 2, S2                        | N/A                                                        |
| <i>EEΔ</i>              | <i>yw ; + ; ss<sup>EEΔ</sup></i>                                                    | 1, 2, 5, S5                     | N/A                                                        |
| <i>LEΔ</i>              | <i>yw ; + ; ss<sup>LEΔ</sup></i>                                                    | 1, 2, 5, S5                     | N/A                                                        |
| <i>tgo</i> Null Clones  | <i>ey&gt;flp/yw ; +/CyO ; FRT82B tgo<sup>del6</sup>/FRT82B ubi&gt;GFP</i>           | S1                              | (Thanawala et al., 2013)                                   |
| <i>sin</i>              | <i>yw ; + ; ss<sup>sin</sup></i>                                                    | 2                               | Anderson 2017                                              |
| Ectopic <i>klu</i>      | <i>Ato(384)&gt;Gal4/yw ; UAS&gt;klu/+ ; +</i>                                       | 2, S2                           | (Klein and Campos-Ortega, 1997)                            |
| <i>ash2</i> Null        | <i>yw ; ey&gt;Gal4, UAS&gt;flp/+ ; FRT82B ash2<sup>1</sup>, e, red/GMR&gt;hid</i>   | 2, S2                           | Bloomington (5253)                                         |
| <i>lid</i> Null         | <i>yw ; FRT40A lid<sup>140</sup> ; FRT40A GMR&gt;hid ; ey&gt;Gal4, UAS&gt;flp/+</i> | 2, S2                           | Bloomington (76954)                                        |
| <i>ash2</i> Null Clones | <i>ey&gt;flp; +; FRT82B Ubi GFP/FRT82B ash2<sup>1</sup>, e, red</i>                 | 2, S2                           |                                                            |
| Ectopic <i>klu</i> Ctrl | <i>Ato(384)&gt;Gal4/yw ; UAS&gt;klu/+ ; P{y[+t7.7] w[+mC]=20XUAS-6XGFP}attP2/+</i>  | S2                              | Bloomington (52262), (Klein and Campos-Ortega, 1997)       |
| <i>klu</i> Null Clones  | <i>ey&gt;flp ; +/CyO ; klu<sup>R51</sup> FRT2A/ubi&gt;GFP FRT2A</i>                 | 3                               | (Klein and Campos-Ortega, 1997; Stowers and Schwarz, 1999) |
| <i>klu</i> Null         | <i>yw ; ey&gt;Gal4, UAS&gt;flp/+ ; GMR&gt;hid,cl FRT2A/klu<sup>R51</sup> FRT2A</i>  | 3, S3                           | (Klein and Campos-Ortega, 1997; Stowers and Schwarz, 1999) |
| <i>S1Δ</i>              | <i>yw ; + ; S1Δ/+</i>                                                               | 3, S3                           | (Johnston and Desplan, 2014)                               |

|                         |                                                                                          |          |                            |
|-------------------------|------------------------------------------------------------------------------------------|----------|----------------------------|
| <i>PRE12Δ</i>           | <i>yw ; + ; PRE12Δ/Df(3R)Exel6269</i>                                                    | 3, S3    | N/A                        |
| <i>PRE2-EEΔ</i>         | <i>yw ; + ; PRE2-EEΔ</i>                                                                 | 3, S3    | N/A                        |
| <i>ss<sup>inv</sup></i> | <i>yw ; + ; ss<sup>inv</sup>/Df(3R)Exel6269</i>                                          | 3, S3    |                            |
| X 3xP3 Ctrl             | <i>yw, M{3xP3-RFP.attP}ZH-2A ; + ; + ; M{RFP[3xP3.PB] GFP[E.3xP3]=vas-int.Dm}ZH-102D</i> | 4, S4    | Bloomington (24480)        |
| <i>Ins1</i>             | <i>yw ; + ; 3xP3&gt;RFP</i>                                                              | 4, S4    | N/A                        |
| <i>Ins2</i>             | <i>yw ; + ; 3xP3&gt;RFP</i>                                                              | 4, S4    | N/A                        |
| <i>Ins3</i>             | <i>yw ; + ; 3xP3&gt;RFP</i>                                                              | 4, S4    | N/A                        |
| <i>Ins4</i>             | <i>yw ; + ; 3xP3&gt;RFP</i>                                                              | 4, S4    | N/A                        |
| <i>Ins5</i>             | <i>yw ; + ; GMR&gt;GFP/+</i>                                                             | 4, S4, 5 | (Thanawala et al., 2013)   |
| WT R7 Reporter          | <i>yw ; pm181&gt;Gal4,UAS&gt;mCD8 GFP/CyO ; +</i>                                        | 5, S5    | N/A                        |
| <i>PΔ</i> R7 Reporter   | <i>yw ; pm181&gt;Gal4,UAS&gt;mCD8 GFP/CyO ; PΔ</i>                                       | 5, S5    | N/A                        |
| <i>EEΔ</i> R7 Reporter  | <i>yw ; pm181&gt;Gal4,UAS&gt;mCD8 GFP/CyO ; EEΔ</i>                                      | 5, S5    | N/A                        |
| <i>LEΔ</i> R7 Reporter  | <i>yw ; pm181&gt;Gal4,UAS&gt;mCD8 GFP/CyO ; LEΔ</i>                                      | 5, S5    | N/A                        |
| <i>R1Δ</i>              | <i>yw ; + ; R1Δ/Df(3R)Exel6269</i>                                                       | 1, T1    | N/A                        |
| <i>R2Δ</i>              | <i>yw ; + ; R2Δ/Df(3R)Exel6269</i>                                                       | 1, T1    | N/A                        |
| <i>R3Δ</i>              | <i>yw ; + ; R3Δ/Df(3R)Exel6269</i>                                                       | 1, T1    | N/A                        |
| <i>R4Δ</i>              | <i>yw ; + ; R4Δ/Df(3R)Exel6269</i>                                                       | 1, T1    | N/A                        |
| <i>R5Δ</i>              | <i>yw ; + ; R5Δ/Df(3R)Exel6269</i>                                                       | 1, T1    | N/A                        |
| <i>R6Δ</i>              | <i>yw ; + ; R6Δ/Df(3R)Exel6269</i>                                                       | 1, T1    | N/A                        |
| <i>R7Δ</i>              | <i>yw ; + ; R7Δ/Df(3R)Exel6269</i>                                                       | 1, T1    | N/A                        |
| <i>R8Δ</i>              | <i>yw ; + ; R8Δ/Df(3R)Exel6269</i>                                                       | 1, T1    | N/A                        |
| <i>R9Δ</i>              | <i>yw ; + ; R9Δ/Df(3R)Exel6269</i>                                                       | 1, T1    | N/A                        |
| <i>PΔ</i>               | <i>yw ; + ; ss<sup>PΔ</sup>/Df(3R)Exel6269</i>                                           | 1, T1    | N/A                        |
| <i>EEΔ</i>              | <i>yw ; + ; ss<sup>EEΔ</sup>/Df(3R)Exel6269</i>                                          | 1, T1    | N/A                        |
| <i>LEΔ</i>              | <i>yw ; + ; ss<sup>LEΔ</sup>/Df(3R)Exel6269</i>                                          | 1, T1    | N/A                        |
| GFP RNAi                | <i>elav&gt;Gal4/w ; UAS&gt;Dcr2/+ ; UAS&gt;GFP RNAi/+</i>                                | T2       | Bloomington (35786)        |
| Cp190 RNAi              | <i>elav&gt;Gal4/w ; UAS&gt;Dcr2/+ ; UAS&gt;Cp190 RNAi/+</i>                              | T2       | Bloomington (35078)        |
| Su(HW) RNAi             | <i>elav&gt;Gal4/w ; UAS&gt;Dcr2/+ ; UAS&gt;su(Hw) RNAi/+</i>                             | T2       | Bloomington (33906)        |
| Mdg4 RNAi               | <i>elav&gt;Gal4/w ; UAS&gt;Dcr2/+ ; UAS&gt;mdg4 RNAi/+</i>                               | T2       | Bloomington (33907)        |
| Trx <sup>E2</sup>       | <i>yw ; ey&gt;Gal4, UAS&gt;flp/+ ; FRT82B trx E2/FRT82B GMR&gt;hid</i>                   | T2       | Gift from Jessica Treisman |
| Trx RNAi                | <i>elav&gt;Gal4/w ; UAS&gt;Dcr2/+ ;</i>                                                  | T2       | Bloomington                |

|                                                                     |                                                                               |    |                         |
|---------------------------------------------------------------------|-------------------------------------------------------------------------------|----|-------------------------|
|                                                                     | <i>UAS&gt;trx RNAi/+</i>                                                      |    | (33703)                 |
| Ash2 RNAi                                                           | <i>elav&gt;Gal4/w ; UAS&gt;Dcr2/+ ; UAS&gt;ash2 RNAi v20/+</i>                | T2 | Bloomington (64942)     |
| Ash2 RNAi                                                           | <i>elav&gt;Gal4/w ; UAS&gt;Dcr2/+ ; UAS&gt;ash2 RNAi v22/+</i>                | T2 | Bloomington (35388)     |
| Mnn1 <sup>e173</sup>                                                | <i>w; Mnn1<sup>e173</sup> ; +</i>                                             | T2 | Gift from Andre Bedard  |
| Mnn1 <sup>e30</sup>                                                 | <i>w; Mnn1<sup>e30</sup> ; +</i>                                              | T2 | Gift from Andre Bedard  |
| Mnn1 RNAi                                                           | <i>elav&gt;Gal4/w ; UAS&gt;Dcr2/+ ; UAS&gt;Mnn1 RNAi/+</i>                    | T2 | Bloomington (35150)     |
| Mnn1 $\Delta$                                                       | <i>w ; Mnn<math>\Delta</math> ; +</i>                                         | T2 | N/A                     |
| Trl RNAi                                                            | <i>elav&gt;Gal4/w ; UAS&gt;Dcr2/+ ; UAS&gt;Trl RNAi/+</i>                     | T2 | Bloomington (67265)     |
| Pc RNAi                                                             | <i>elav&gt;Gal4/w ; UAS&gt;Dcr2/+ ; UAS&gt;Pc RNAi/+</i>                      | T2 | Bloomington (36070)     |
| Pc <sup>4</sup>                                                     | <i>ey&gt;flp ; +/CyO ; FRT2A Pc<sup>4</sup>/ FRT2A ubi&gt;GFP</i>             | T2 | Gift from Judith Kassis |
| Pc <sup>XT</sup>                                                    | <i>ey&gt;flp ; +/CyO ; FRT2A Pc<sup>XT</sup>/ FRT2A ubi&gt;GFP</i>            | T2 | Gift from Judith Kassis |
| Ph-d <sup>410</sup> Ph-p <sup>401</sup>                             | <i>Ph-d<sup>410</sup> Ph-p<sup>401</sup> ; + ; +</i>                          | T2 | Gift from Judith Kassis |
| Cg <sup>A22</sup>                                                   | <i>w; FRT42D cg<sup>A22</sup>/FRT42D GMR&gt;hid; ey&gt;Gal4, UAS&gt;flp/+</i> | T2 | Gift from Judith Kassis |
| Pho <sup>1</sup>                                                    | <i>w; + ; +; pho<sup>1</sup></i>                                              | T2 | Gift from Judith Kassis |
| Pho <sup>b</sup>                                                    | <i>w; + ; +; pho<sup>b</sup></i>                                              | T2 | Gift from Judith Kassis |
| Pho RNAi                                                            | <i>elav&gt;Gal4/w ; UAS&gt;Dcr2/+ ; UAS&gt;pho RNAi/+</i>                     | T2 | Bloomington (35206)     |
| Pho <sup>81A</sup>                                                  | <i>w; + ; pho<sup>81A</sup></i>                                               | T2 | Gift from Judith Kassis |
| Spps <sup>1</sup>                                                   | <i>w; + ; Spps<sup>1</sup></i>                                                | T2 | Gift from Judith Kassis |
| E(z) <sup>61</sup> 18°C                                             | <i>w; + ; E(z)<sup>61</sup></i>                                               | T2 | Gift from Judith Kassis |
| E(z) <sup>61</sup> 29°C<br>hs 3 <sup>rd</sup> instar<br>4hrs        |                                                                               | T2 | Gift from Judith Kassis |
| E(z) <sup>61</sup> 29°C<br>hs 3 <sup>rd</sup> instar<br>4hrs        |                                                                               | T2 | Gift from Judith Kassis |
| E(z) <sup>61</sup> 29°C<br>hs 2nd instar<br>to late<br>pupation 120 |                                                                               | T2 | Gift from Judith Kassis |

|                    |                                                                                   |    |                            |
|--------------------|-----------------------------------------------------------------------------------|----|----------------------------|
| hrs                |                                                                                   |    |                            |
| Psc <sup>h28</sup> | <i>w ; Psc<sup>h28</sup> ; +</i>                                                  | T2 | Gift from Judith Kassis    |
| H3.3K27M           | <i>w ; GMR&gt;Gal4/UAS&gt;H3.3K27M ; +</i>                                        | T2 | Gift from Kami Ahmed       |
| Lid RNAi           | <i>elav&gt;Gal4/w ; UAS&gt;Dcr2/+ ; UAS&gt;lid RNAi/+</i>                         | T2 | Bloomington (28944)        |
| Lid <sup>140</sup> | <i>yw ; FRT40A lid<sup>140</sup> /FRT40A GMR&gt;hid ; UAS&gt;flp/+</i>            | T2 | Gift from Judith Kassis    |
| Osa <sup>306</sup> | <i>yw ; ey&gt;Gal4, UAS&gt;flp/+ ; FRT82B osa<sup>308</sup>/FRT82B GMR&gt;hid</i> | T2 | Gift from Jessica Treisman |

**Table S4. CRISPR Deletion Mutants, Related to STAR Methods**

| Deletion Name  | Homologous Bridge                                                                                                                       | Deletion Size         |
|----------------|-----------------------------------------------------------------------------------------------------------------------------------------|-----------------------|
| R1 $\Delta$    | GAGTTGATTGAAGGCTGTAAGAGCAGATTACAGTGGGGCGGAGGCCCAA<br>GTCTGGATCTCGGTACCAACTCTCCATTGTGCATAATAATTGATTTGATT<br>GATGCTTCGACGGCTGCCGATGCTGCT  | 6,229 bp              |
| R2 $\Delta$    | CACAATTTACCAATCAAATAACAAATGCGCCACCAAAGATGCTTATTAA<br>TGGCGGCAACGGTACCTCTGGGTATTCATTTTTTCGACTTGGCAATTG<br>CAAATGCAAAAACCATTTTCATTGCCGA   | 6,863 bp              |
| EE $\Delta$    | AAAATAGATGGCTATTAAGTATAGTTATTGAAGTGGGTCCATCAATCCAT<br>CTTCTCCATTGGATCCCATGGCCTCAGAGCGAAAAAAAACGAGGGGGC<br>AGAGGCGTAGTTTTTCGGAATTAATCCT  | 1,278 bp              |
| pEE $\Delta$   | ATCGGGTTACGTACTCCCTCGCAACGTGAGAACCCTCGCCACTGTCAGGT<br>GAAGTCCACTGAATTCTCTCATAAGAATCTTAAAAATGATAAAGATATTT<br>TCTTCGATAGCTTTATTTCAGATATC  | 4,089 bp              |
| extEE $\Delta$ | AAAATAGATGGCTATTAAGTATAGTTATTGAAGTGGGTCCATCAATCCATC<br>TTCTCCATTAGAATTCCTCATAAGAATCTTAAAAATGATAAAGATATTTT<br>CTTCGATAGCTTTATTTCAGATATC  | 5,367 bp              |
| R3 $\Delta$    | TCACATAAAGGCAGCCATTTTTGGGCCGCCACAAACGGCAATTATAATT<br>GGGCTACTTAGAATTCGATAAACAGAGCCCACGAGCAACAACACTAC<br>CAACACAAACGGCAAAAGTGCAAGTGAA    | 1,540 bp              |
| P $\Delta$     | CTTCCACTTGTACTACTTCCCTCCACTCCACTCGACTCAGCTCACTTATT<br>AGTGCCACCGAATTCGATAAACAGAGCCCACGAGCAACAACACTACCA<br>ACACAAACGGCAAAAGTGCAAGTGAA    | 1,993 bp              |
| R4 $\Delta$    | CTTGGGTGCTCTGTTATTACTGAAAGATTCAATCAATGCGATTGGCTGC<br>ACTTACCCTGGTACCGTCTAGCGAATATTACGCATACGACGCATAGAC<br>TTACTGCACATTTGGCCAAGTTCATT     | 1,543 bp              |
| LE $\Delta$    | CAATTTAATTGAGCTCCCAAGTGTCTGGGAAGCAGCTGCCCTTTGAATTGG<br>GCTTCTCACGAATTCCTGGCTGGCTTTGGAGCTCCTTTTGGTGAGAGAC<br>CAAAAGAGATTCCGCTGCGCGAATCG  | 3,181 bp              |
| R5 $\Delta$    | GGAGGTGGTATCTGGCCCGGGCAGGTGATACTTTCAGTTACCTTTCCCT<br>TACCCAGAACGAATTCGAGGGCCGTGAACCTGAGCCTGCGACCGATTCT<br>TCCGAGATTCTTAGTCGCAGCCTTCGT   | 1,645 bp              |
| R6 $\Delta$    | TCCCCAAAGGGCGAAAAGGACCAACCGACCGACAGACAGACAAAACACAC<br>GCACGTGCTGTGAATTCTACACATTACATATAATGTGTCTATTATTTC<br>TCTACACATCCTTATGCCAATCTATCC   | 3,848 bp              |
| R7 $\Delta$    | GGATATAAATAGTTATTCTAATGACTTTGGTTTTTCCAAGCTTAATAAAA<br>GTTTTCTATGAATTCACAGGCGCACATACCATCACTGTATATATATAT<br>ATATCTATGATATATTGGGTTTTTAT    | 2,393 bp              |
| R8 $\Delta$    | CCTCTCAATCACCCCGATTGTCTTCATCAGTGTGTTTTGTTGATGGCTTCA<br>TTGGCCAGGGAATTCATTCATTCATCTAGCTATTGATTCTTGATCTATCC<br>ACTTGTCTGAGTGGCACACCGTAA   | 3,933 bp              |
| R9 $\Delta$    | TTCAGCAGGAGGAGCATCGGATATCCATACCAGCAATTGGCCATTGTGT<br>CCGCTCCTCTGGATCCGGCAAGCTACCGAGTGATGATACTGCTGGTACGG<br>TAATGCTGCTTCTGTGGCATCGGCAA   | 4,871 bp              |
| PRE12 $\Delta$ | TGAGTTGATTGAAGGCTGTAAGAGCAGATTACAGTGGGGCGGAGGCCCAA<br>AGTCTGGATCTGCCGGCCTCTGGGTATTCATTTTTTCGACTTGGCAATTG<br>CAAATGCAAAAACCATTTTCATTGCCG | 10,285 bp<br>Deletion |
| Mnn $\Delta$   | GAGAAAAAAAACAAGAAAACAAAAACAAAACGCGCAGCCGAAAAATCG<br>GCAACAACAAAAGCGAGGAAGAGCTAAATGTGTGGGAGGACAACCTGGG<br>ACGACGACAACGTGGAGGACGACTTC     | 7,656 bp<br>Deletion  |

**Table S5. CRISPR Insertion Mutants, Related to STAR Methods**

| Mutant Name | Homologous Bridge                                                                                                                                                                                                                                                                                                                                                                                                                                                                                                                                                                                                                                                                                                                                                                                                                                                                                                                                                                                                                                                                                                                                                                                                                                                                                                                                                                                                                                                                                                                                                                                                                                                                                                                                                                                                                                                                                                                                                                                                                                                                                                                                                          | Mutation                                                                              |
|-------------|----------------------------------------------------------------------------------------------------------------------------------------------------------------------------------------------------------------------------------------------------------------------------------------------------------------------------------------------------------------------------------------------------------------------------------------------------------------------------------------------------------------------------------------------------------------------------------------------------------------------------------------------------------------------------------------------------------------------------------------------------------------------------------------------------------------------------------------------------------------------------------------------------------------------------------------------------------------------------------------------------------------------------------------------------------------------------------------------------------------------------------------------------------------------------------------------------------------------------------------------------------------------------------------------------------------------------------------------------------------------------------------------------------------------------------------------------------------------------------------------------------------------------------------------------------------------------------------------------------------------------------------------------------------------------------------------------------------------------------------------------------------------------------------------------------------------------------------------------------------------------------------------------------------------------------------------------------------------------------------------------------------------------------------------------------------------------------------------------------------------------------------------------------------------------|---------------------------------------------------------------------------------------|
| <i>Ins1</i> | <p>ACACAAGATACCAGGATCCAAAAATGAATGCTGCCAAAATCACTTTAGGTGTAT<br/>           ATTCTTAACAAGGTCTGTTGAATTCATGATGGTTTATAAAATGAAAGTAAACTAC<br/>           CTCTGTAAAGATGTAAATTAAGCACCCTTATAAAATTTGTAATGCTTTTAAAC<br/>           ACTAAAGTTAGTTTTTTCTAAGTATAACCCATTGTCCTTGCTCGTCATTAACCG<br/>           TAGAAATGTTTTATGACAAACAATTCAAATTTGGGAAACTGAAAGACAAAGTTA<br/>           TCATAAAATATAATTGCCAGGGCGGACAAGTATTAATCAAAAAAAAAATCCAT<br/>           CACTATTTATTTAGTAATTTTCGAGAATTTGTCAGGTCTGGAACTTGTTTTTCT<br/>           TCAGACTGTTTAAAGTAATATTTCAATTTAATTAATATAATTTGTTAAGATAATTG<br/>           GTCACAGACTAAAGTGTTTTATGGATCAATTGGAAATTTGCGTGCCAGTTTTGG<br/>           TAACAGTTTAGTTAATGGCTTTATTGATTTGGTTAAGAGGGGGGAGGGCCCTAAA<br/>           GCTGGGATAGGGGTGTTTCAGTAACCTCACTATTTTTGTGAACACACTTTTCCTTT<br/>           TCCTTTTCAGCTAAGTAATAACTCTGGTAGTATACTAAAAATTTTATTTAACATG<br/>           CATTTTGCATTTGCATATGTAATGAGAGAAGTGACTTATATACTTATTTATTGCG<br/>           GCTATTCGGTGAGACAATTAACACATAATAAAGTACTATGCATTATACAAATTTTA<br/>           AATTATTTTTATAGGGAGACCCACCTGAAACTCGAGGCACACCTCTTCTGGCTAA<br/>           CACTCATCGTCAGTAAATAATATTCGTATAAAAAATGCGCAAATAAAAAAAAAAT<br/>           GAAGAAGCAGAAGAAAGAAAAGGAGGGAAAAATGTTAAAAATAAAGTCATAATT<br/>           TCTGGAATGATTTATGAATTGCACCGCGGAGGGGAAACAGGCCAGCAGACAGGT<br/>           GAAGAGGAGGTTGGGGAGGACTTTGGACCCAACAGGGTCTCTCTCCATTATTAC<br/>           ACATTTTATTAATTTCTTTTTGTGGCCCGCTCTATTGCAACGTTTTTAAATTA<br/>           ATTTCTTCGCTGAATTGCATTTTAGCTCCAGTTCGAGTTGGCTCAATTCGCATT<br/>           TCTCAGTCGGGCGGACGGGGGTGGGTGTGTGAAAGGGGGGAAATCGGGGATCTC<br/>           AGATCGGCATTAGCATAAACCCGACACGCATGCCGTCTGCTGTCTGCCGAGGGC<br/>           AGGGTTGCCCGCGGTTGGGAAAGGGGGTAAGGTGAATTCTCTACCCAGAGAGC<br/>           TTGTTAAATTTTCGACATGGCCTTATGATTAGCTGAATTATGCTTTTAAAAATTTG<br/>           CATTGCGATAAGATCGAGCTTAGCGCCTAGCCAGCTTCGATGCCTCCGACGCAG<br/>           CGGCATTATCATTGAATGGGATATGCATAAAGAAGCTTGTGAGAGAGGGCCAA<br/>           TGGCTTGGCAAAGGGTTAACCTGATAATCAAACCATTAAGCTGTCTTAAATGCT<br/>           CCGACTAATTGCAGACAGCAGGGTTTTCCAGCCCTGTCTAAAGCACAAAGCCTG<br/>           TTCAGTCGGAGTTGATAGTGAACATGATCCTAATCTATGCAAAG</p> | <p>40 bp<br/>           Deletion,<br/>           ~2,200 bp<br/>           Insert</p>  |
| <i>Ins2</i> | <p>GTGAGTGTCCCCGAATAAGGCAATACAACAACAATAGAGGGGAAAAACAGAAA<br/>           CAAAAGCGAAACGCAGCACGCGATACCCTGTAAGTGGAGGTTCTGTAAAGGCTT<br/>           CGAGGAGTCACGTGTGCAATTGCAGACCCGCGCGGTCATTCACTTCTATCTAT<br/>           TTTACTATTTCCAACACACCCACGCGCGGTGTGTGTGTGCGTGCCTGAAAAATGT<br/>           CACTTTGACAACCTCGCCTCTGGTTGCTCTGCCGGGATCTGCCTACGTCGACGT<br/>           CGATCGTGCCGCAAAAATGAAAAATATTTGCGTGCCGTTCTTGCCTCGGAAAG<br/>           CGAAGAACCAGGATCTATTTAGGATAAGCACGCAGTTGATAGATTGGTTATCCA<br/>           ACTCATCTAATATGGCGTGAATGTTTCGTCTACTTAGTTGATGCGGATTAGTAA<br/>           ACCAGTTATTAACAGTATAGCTCCATTTCAAAGATACTCTACGGGGAAATATTTAC<br/>           TATTAACCGCTTAGCTTTAGTATTAATAATTTACATTAGATGT</p>                                                                                                                                                                                                                                                                                                                                                                                                                                                                                                                                                                                                                                                                                                                                                                                                                                                                                                                                                                                                                                                                                                                                                                                                                                                                                                                                                                                                                                                                   | <p>300 bp<br/>           Deletion,<br/>           ~3,200 bp<br/>           Insert</p> |
| <i>Ins3</i> | <p>GTGAGTCCCAGTCCAGCTAAAAGAACCCTTCCCCATCAACTCCTCTCAATCAC<br/>           CCCGATTTGCTTCATCAGTGTGTTTGTGATGGCTTCATTGGCCAGGATACGTGG<br/>           TGTGTTTTCTGACTGGGTGGGGTAAAGGGGAATAATCAATCAGCGTCTGGTTA<br/>           GCCGGGAGAGTTTCCATTGATAAATACTGGGCACGCAATAGAGAGTCGGTGGTG<br/>           AAGGTCTGGGAAAAATCCACTTCTTCACTAATATTCTGTCAATTTGTAATTGTCTGC<br/>           AATTAATAAGTTCTGGAATTGATTAACCTAATTGAGGTGGGAAAGGGATGGGGC<br/>           GCAGAAACAATTAGACTGTGGGGAGAAATCTTCTTGGCCGTATAAAAAAGGTAA<br/>           AATGCCGCAAGAAATGAAAAGAGATGAGCACAAAAAAATCAGCGTACAAAAA<br/>           GAAAACAACAACCCGTTAGCAGGACTCATATACAATATTTAGATACCCTTTTT<br/>           AAGATGTCATAAAATGTATTTAATGTAATATCCTTTATGCGGTATCTG</p>                                                                                                                                                                                                                                                                                                                                                                                                                                                                                                                                                                                                                                                                                                                                                                                                                                                                                                                                                                                                                                                                                                                                                                                                                                                                                                                                                                                                                                                                | <p>1 bp<br/>           Deletion,<br/>           ~3,200 bp<br/>           Insert</p>   |
| <i>Ins4</i> | <p>GCCTTTCGCACACAACCTCTCCGACGAGCAACAACAGCAGCAGCTCCACAA<br/>           TCACAGCGAGGAGTTGGTTCCAATGTTAGCGCTCCCAGCAGCTCACTCACTAGCA<br/>           CGGGCACAGATCAGCAGGCGGTGCACCCATCCAGTTGCCATCAACAACAGCAGC<br/>           AGCAGCAGCAACAACACCATCACGCCACCCGCATCCGCACTCGCATCATCACC<br/>           ACCATCATCACCATCACCATGAGACGGCGCATCAGCACAGCAGCGAGGTATGGA<br/>           CGCCCGCTCTCAAAAACAATCAGAGCGGAAATAAATCTAGAAAAATAATCGAATC<br/>           ACTAATGGTCTTTAATTC AACATCCTTATCCAAACGCTATTTCATGTAACAATTT<br/>           TTAGGTACCTTTACAACACGTATATTTGAATAGACCGGCGTATTACAAAAAATTA<br/>           AGATCTGTTGCCATTTTGCCTAAGAGTATGCCACAATATGGCATGTGCAAAGT<br/>           AGCCCCAAAAATATGCCACGAAAGTCTGGTAAC</p>                                                                                                                                                                                                                                                                                                                                                                                                                                                                                                                                                                                                                                                                                                                                                                                                                                                                                                                                                                                                                                                                                                                                                                                                                                                                                                                                                                                                                                                                             | <p>2 bp<br/>           Deletion,<br/>           ~3,200 bp<br/>           Insert</p>   |

**Table S6. Oligopaints Probe Libraries, Related to STAR Methods**

| <b>Probe Set</b>  | <b>Oligo Paints Library</b> | <b>Coordinates</b>        | <b>Conjugated Fluorophore</b> |
|-------------------|-----------------------------|---------------------------|-------------------------------|
| ss RNA            | ss-Full-RNA                 | 3R: 16,370,515-16,435,663 | Cy3                           |
| ss DNA            | ss-Ext-Univ                 | 3R: 16,370,516-16,435,663 | Cy3                           |
| ss Upstream DNA   | 50-kb extension (left)      | 3R: 16,320,533-16,370,533 | Alexa 488                     |
| ss Downstream DNA | 50-kb extension (right)     | 3R: 16,435,681-16,485,681 | Cy5                           |
